# Supplementary material for: Propagation rate coefficients of 2-(dimethylamino)ethyl methacrylate radical polymerization in bulk, alcohols and alcohol/water solutions determined by PLP-SEC
Source: Royal Society of Chemistry journal article supplement (doi:10.1039/d4py00331d), 2024-01-01
Supplement: d4py00331d1.pdf [file d4py00331d1.pdf]

## Supporting Information

# Propagation Rate Coefficients of 2-(Dimethylamino)ethyl Methacrylate Radical Polymerization in Bulk, Alcohols and Alcohol/Water Solutions Determined by PLP-SEC

*Opeyemi J. Ajogbeje,<sup>a</sup> Igor Lacík<sup>b</sup> and Robin A. Hutchinson<sup>a,\*</sup>*

<sup>a</sup> Department of Chemical Engineering, Dupuis Hall, Queen's University, Kingston, Ontario, K7L 3N6, Canada

<sup>b</sup> Department for Biomaterials Research, Polymer Institute of the Slovak Academy of Sciences, Dúbravská cesta 9, 845 41 Bratislava, Slovakia

**Corresponding author**

\*E-mail: robin.hutchinson@queensu.ca

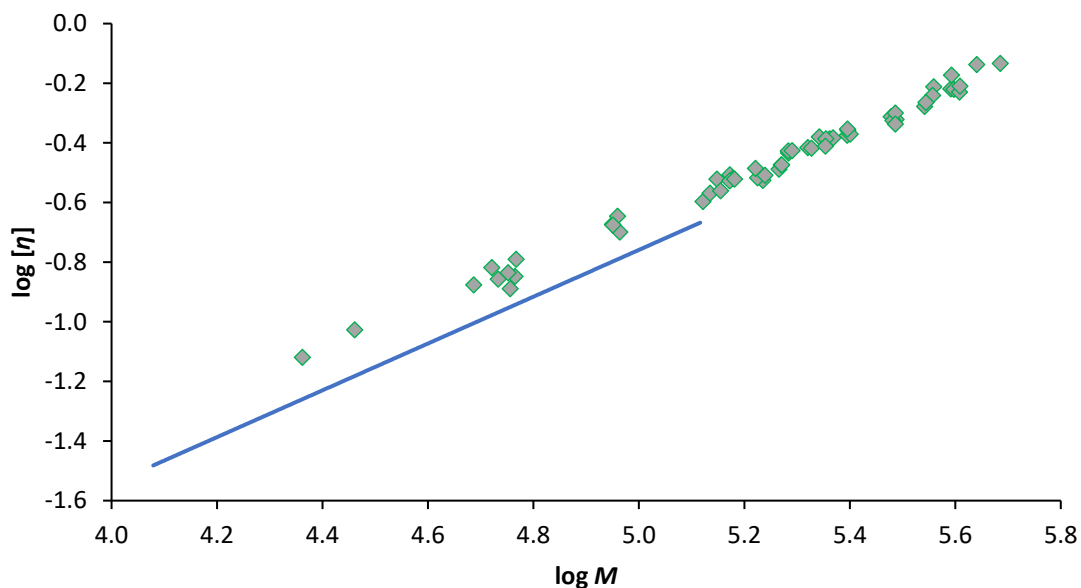

Figure S1: A comparison of the MHKS relationship between PDMAEMA intrinsic viscosity and polymer molar mass in THF estimated in this work (Waters-Wyatt setup (blue line)) to values reported by Kockler et al.<sup>1</sup> (green diamonds). Kockler et al. used their MHKS values for PDMAEMA in combination with PMMA calibration, whereas in this study PS calibration was employed.

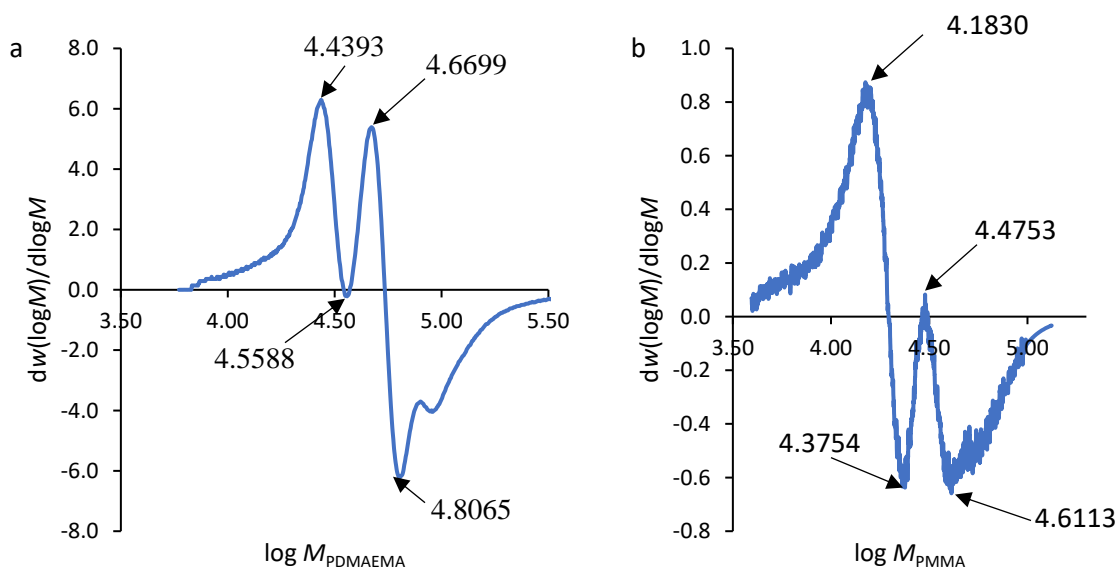

Figure S2: A comparison of PDMAEMA first derivative curves determined by differentiation of the polymer MMDs analyzed by: (a) SEC-RI in THF according to PDMAEMA calibration and (b) SEC-RI in DMF (1 mmol L<sup>-1</sup> LiBr) using pMMA calibration. The polymer was generated by PLP by pulsing bulk monomer at 90 °C with a p.r.r. of 100 Hz.

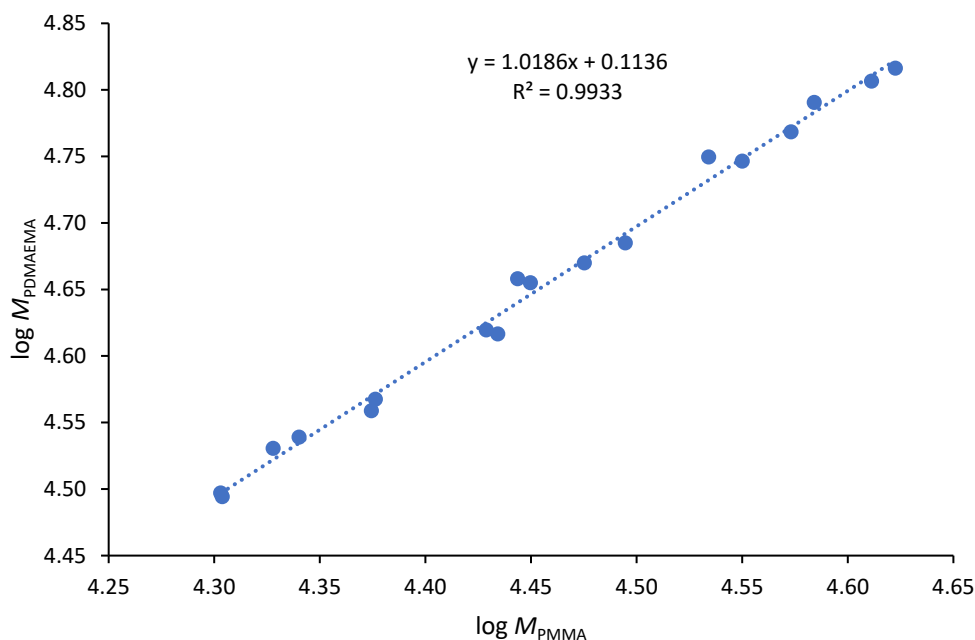

Figure S3:  $\log M_{PDMAEMA}$  vs  $\log M_{PMMA}$  values obtained from analysis of PDMAEMA MMDs by RI detection in THF (calculated according to universal calibration) and RI detection in DMF ( $1 \text{ mmol L}^{-1}$  LiBr) according to PMMA calibration, respectively. The fit was used to estimate MHKS parameters of PDMAEMA in DMF as  $K = 6.99 \times 10^{-5} \text{ dL g}^{-1}$  and  $\alpha = 0.663$  from the slope and intercept according to Eq. 2 of the article.

Table S1: Mark-Houwink-Kuhn-Sakurada (MHKS) parameters for PDMAEMA and calibration polymers PS and PMMA analyzed by organic-phase SEC

| Polymer-solvent system      | $K$<br>[ $\text{dL g}^{-1}$ ] | $a$   | $dn/dc$<br>[ $\text{mL g}^{-1}$ ] | Reference |
|-----------------------------|-------------------------------|-------|-----------------------------------|-----------|
| PDMAEMA (THF)               | $4.98 \times 10^{-5}$         | 0.729 | 0.086                             | 1         |
| PDMAEMA (THF)               | $2.07 \times 10^{-5}$         | 0.785 | -                                 | This work |
| PS (THF)                    | $1.14 \times 10^{-4}$         | 0.716 | -                                 | 2,3       |
| PMMA (DMF <sup>a</sup> )    | $1.08 \times 10^{-4}$         | 0.694 | -                                 | 4         |
| PDMAEMA (DMF <sup>a</sup> ) | $6.99 \times 10^{-5}$         | 0.663 | -                                 | This work |

<sup>a</sup> containing  $1 \text{ mmol L}^{-1}$  LiBr

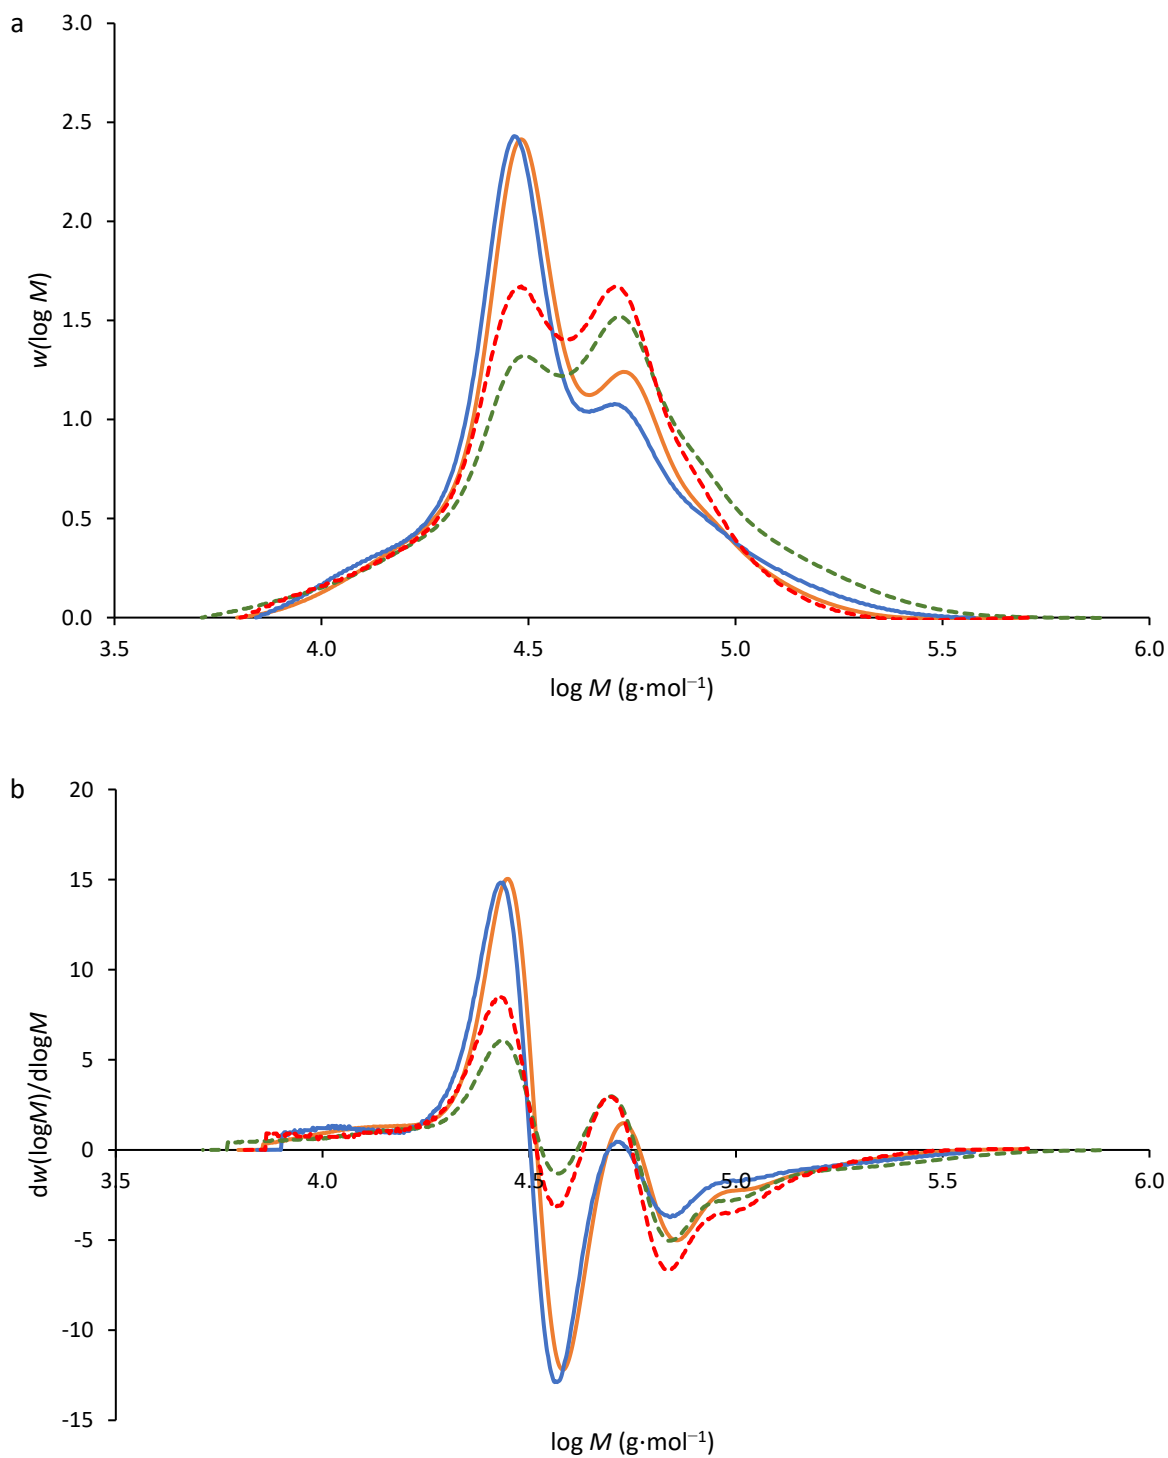

Figure S4: PLP-generated PDMAEMA a) MMDs and b) first derivative plots from SEC analysis in THF of bulk DMAEMA at 30 °C and 20 Hz with 5 mmol L<sup>-1</sup> DMPA (solid lines) and 5 mmol L<sup>-1</sup> Darocur 1173 (dashed lines), with two repeated polymerization experiments shown for each photoinitiator. The inflection point positions were the same for both initiators, with improved PLP structure obtained using DMPA.

Table S2: Propagation rate coefficients for polymerization of bulk DMAEMA determined from PLP-SEC experiments conducted between 30 and 90 °C with 5 mmol L<sup>-1</sup> DMPA at varying laser pulse repetition rates (p.r.r.) and employing different SEC setups for analysis of MMDs of PDMAEMA.

| T [°C] | p.r.r. [Hz] | $x_p$ [%] | $\log M_1$ | $M_1/M_2$ | SEC setup | $k_p$ [L mol <sup>-1</sup> s <sup>-1</sup> ] |
|--------|-------------|-----------|------------|-----------|-----------|----------------------------------------------|
| 30     | 20          | 0.5       | 4.5069     | 0.52      | THF       | 694                                          |
|        | 20          | 0.6       | 4.4902     | 0.48      | THF       | 668                                          |
|        | 20          | 0.5       | 4.4748     | 0.48      | THF       | 645                                          |
|        | 30          | 0.8       | 4.3204     | 0.52      | THF       | 678                                          |
|        | 30          | 0.9       | 4.3178     | 0.52      | THF       | 674                                          |
|        | 30          | 0.5       | 4.3379     | 0.52      | THF       | 705                                          |
|        |             |           | 4.3323     | 0.47      | DMF       | 696                                          |
|        | 30          | 0.2       | 4.3640     | 0.54      | Aqueous   | 749                                          |
|        | 30          | 0.2       | 4.3581     | 0.54      | Aqueous   | 739                                          |
|        |             | 30        | 0.2        | 4.3563    | 0.53      | Aqueous                                      |
| 50     | 20          | 0.6       | 4.6790     | 0.48      | THF       | 1053                                         |
|        | 20          | 0.6       | 4.6820     | 0.46      | THF       | 1061                                         |
|        | 20          | 0.4       | 4.6820     | 0.46      | THF       | 1061                                         |
|        | 40          | 1.1       | 4.3946     | 0.53      | THF       | 1094                                         |
|        | 40          | 0.7       | 4.3732     | 0.53      | THF       | 1042                                         |
|        | 40          | 0.4       | 4.3950     | 0.52      | THF       | 1095                                         |
|        | 50          | 0.7       | 4.3335     | 0.53      | THF       | 1188                                         |
|        | 50          | 0.9       | 4.3361     | 0.54      | THF       | 1196                                         |
|        |             |           | 4.3152     | 0.48      | DMF       | 1139                                         |
|        | 70          | 40        | 1.0        | 4.5926    | 0.51      | THF                                          |
| 40     |             | 1.3       | 4.5926     | 0.51      | THF       | 1764                                         |
| 40     |             | 0.6       | 4.5686     | 0.52      | THF       | 1669                                         |
| 70     |             | 1.1       | 4.3599     | 0.54      | THF       | 1806                                         |
| 70     |             | 1.2       | 4.3519     | 0.54      | THF       | 1773                                         |
| 70     |             | 0.6       | 4.3611     | 0.53      | THF       | 1811                                         |
|        |             |           | 4.3678     | 0.52      | DMF       | 1839                                         |
| 80     |             | 1.2       | 4.3256     | 0.52      | THF       | 1907                                         |
| 80     |             | 1.6       | 4.3361     | 0.54      | THF       | 1954                                         |
| 90     |             | 50        | 1.3        | 4.6190    | 0.50      | THF                                          |
|        | 50          | 1.4       | 4.6220     | 0.51      | THF       | 2411                                         |
|        | 50          | 0.7       | 4.6314     | 0.52      | THF       | 2464                                         |
|        | 100         | 1.4       | 4.3732     | 0.54      | THF       | 2719                                         |
|        | 100         | 1.7       | 4.3732     | 0.54      | THF       | 2719                                         |
|        | 100         | 1.3       | 4.3741     | 0.53      | THF       | 2724                                         |
|        |             |           | 4.3740     | 0.50      | DMF       | 2724                                         |

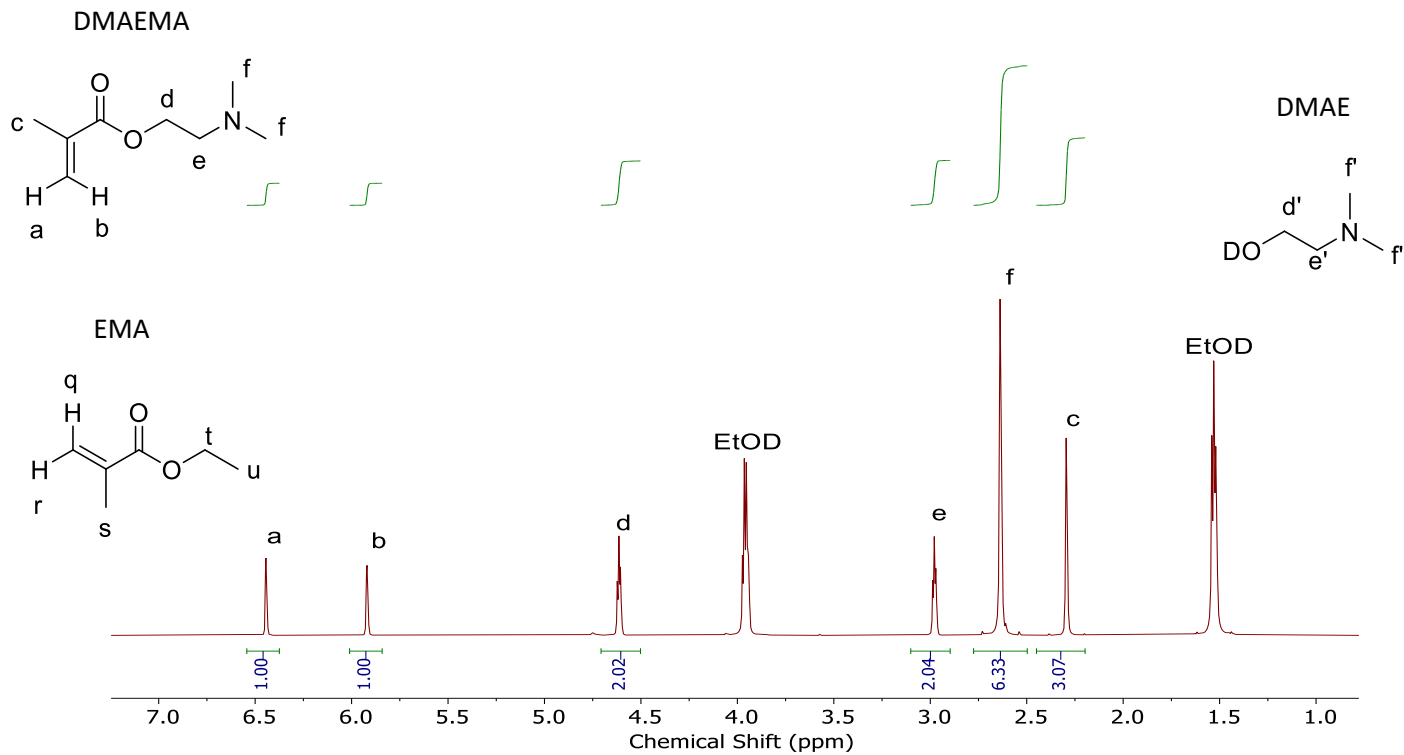

Figure S5:  $^1\text{H}$  NMR (700 MHz) spectrum of PLP mixture with  $w_{\text{DMAEMA}} = 0.50$  in EtOD held for 4 min at 70 °C. No ethyl methacrylate and 2-dimethylaminoethanol were observed in either spectrum, indicating that DMAEMA ethanolysis does not occur within the timeframe of the PLP experiment.

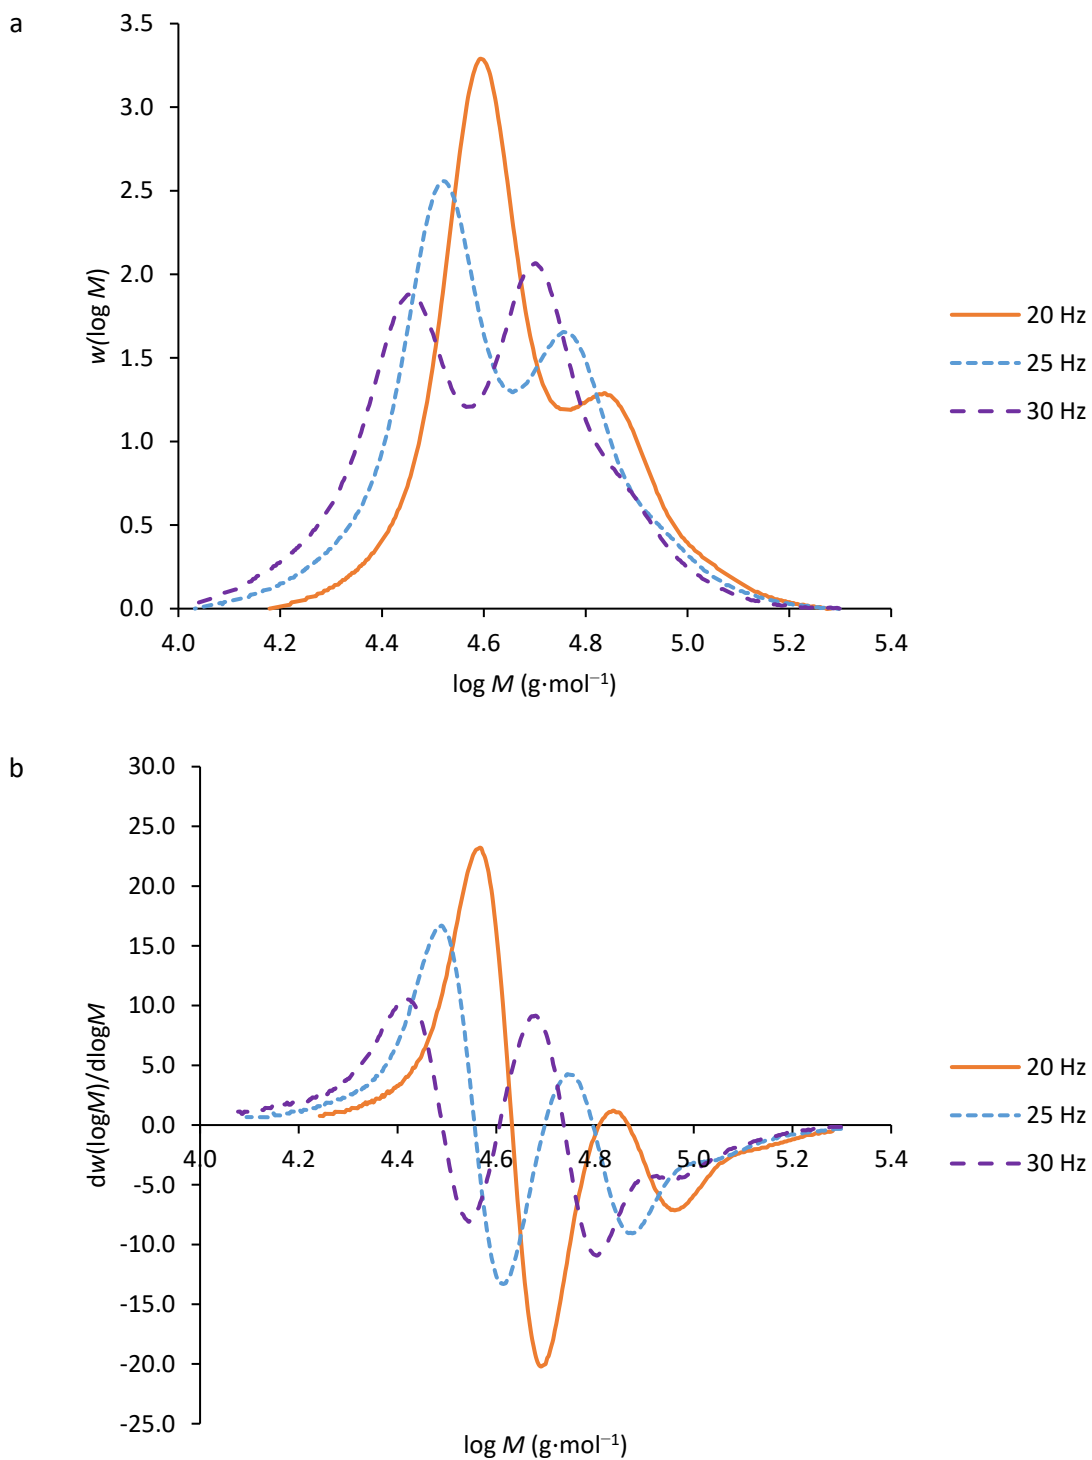

Figure S6: PLP-generated PDMAEMA a) MMDs and b) first derivative plots from SEC analysis in THF of  $w_{\text{DMAEMA}} = 0.625$  DMAEMA polymerized in EtOH with 5 mmol L<sup>-1</sup> DMPA at 60 °C using p.r.r. 20, 25, and 30 Hz.

Table S3(a): Propagation rate coefficients for polymerization of DMAEMA in EtOH determined from PLP-SEC experiments conducted at 30 °C at varying laser pulse repetition rates (p.r.r.) tabulated as a function of weight fraction DMAEMA ( $w_{\text{DMAEMA}}$ ) in solution. Experiments were conducted with 5 mM DMPA unless otherwise noted.

| $w_{\text{DMAEMA}}$ | p.r.r. [Hz] | $x_p$ [%] | $\log M_1$ | $M_1/M_2$ | SEC setup | $k_p$ [L mol <sup>-1</sup> s <sup>-1</sup> ] |
|---------------------|-------------|-----------|------------|-----------|-----------|----------------------------------------------|
| 0.625               | 10          | 0.3       | 4.5617     | 0.53      | THF       | 667                                          |
|                     | 15          | 0.4       | 4.4016     | 0.53      | THF       | 692                                          |
|                     | 15          | 0.4       | 4.4017     | 0.53      | THF       | 680                                          |
| 0.50                | 10          | 0.4       | 4.4721     | 0.52      | THF       | 691                                          |
|                     | 10          | 0.3       | 4.4720     | 0.52      | THF       | 690                                          |
|                     | 10          | 0.3       | 4.4722     | 0.52      | THF       | 692                                          |
| 0.375               | 10          | 0.8       | 4.3433     | 0.53      | THF       | 698                                          |
|                     | 10          | 0.7       | 4.3434     | 0.53      | THF       | 697                                          |
|                     | 10          | 0.7       | 4.3432     | 0.53      | THF       | 699                                          |



Table S3(b): Propagation rate coefficients for polymerization of DMAEMA in EtOH determined from PLP-SEC experiments conducted at 40 °C at varying laser pulse repetition rates (p.r.r.) tabulated as a function of weight fraction DMAEMA ( $w_{\text{DMAEMA}}$ ) in solution. Experiments were conducted with 5 mM DMPA unless otherwise noted.

| $w_{\text{DMAEMA}}$ | p.r.r. [Hz] | $x_p$ [%] | Log $M_1$ | $M_1/M_2$ | SEC setup | $k_p$ [L mol <sup>-1</sup> s <sup>-1</sup> ] |
|---------------------|-------------|-----------|-----------|-----------|-----------|----------------------------------------------|
| 0.625               | 15          | 0.7       | 4.4969    | 0.54      | THF       | 871                                          |
|                     | 20          | 0.7       | 4.3908    | 0.54      | THF       | 891                                          |
|                     | 20          | 0.7       | 4.3909    | 0.54      | THF       | 910                                          |
| 0.50                | 10          | 0.3       | 4.5560    | 0.52      | THF       | 848                                          |
|                     | 15          | 0.4       | 4.3980    | 0.51      | THF       | 884                                          |
|                     | 15          | 0.4       | 4.3890    | 0.50      | THF       | 866                                          |
| 0.375               | 10          | 0.3       | 4.4329    | 0.52      | THF       | 867                                          |
|                     | 10          | 0.4       | 4.4250    | 0.52      | THF       | 865                                          |
|                     | 10          | 0.4       | 4.4245    | 0.51      | THF       | 868                                          |
| 0.30                | 30          | 1.3       | 3.8601    | 0.47      | THF       | 878                                          |
|                     | 30          | 1.3       | 3.8600    | 0.47      | THF       | 877                                          |
|                     | 30          | 1.3       | 3.8602    | 0.47      | THF       | 879                                          |
| 0.25                | 30          | 1.2       | 3.7884    | 0.48      | THF       | 897                                          |
|                     | 30          | 1.2       | 3.7883    | 0.48      | THF       | 896                                          |
|                     | 30          | 1.2       | 3.7885    | 0.48      | THF       | 898                                          |
| 0.20                | 30          | 2.0       | 3.7332    | 0.52      | THF       | 998 <sup>a</sup>                             |
|                     | 35          | 2.0       | 3.6753    | 0.51      | THF       | 1019 <sup>a</sup>                            |
|                     | 40          | 2.1       | 3.6369    | 0.51      | THF       | 1066 <sup>a</sup>                            |
| 0.10                | 30          | 4.4       | 3.4980    | 0.47      | THF       | 1178 <sup>a</sup>                            |
|                     | 30          | 4.4       | 3.4979    | 0.47      | THF       | 1177 <sup>a</sup>                            |
|                     | 30          | 4.4       | 3.4981    | 0.47      | THF       | 1179 <sup>a</sup>                            |
| 0.05                | 10          | 7.7       | 3.7187    | 0.47      | THF       | 1314 <sup>a</sup>                            |
|                     | 10          | 7.2       | 3.6994    | 0.46      | THF       | 1252 <sup>a</sup>                            |
|                     | 10          | 7.3       | 3.6993    | 0.46      | THF       | 1284 <sup>a</sup>                            |
|                     | 20          | 8.4       | 3.4570    | 0.46      | THF       | 1439 <sup>a</sup>                            |
|                     | 20          | 10.6      | 3.4719    | 0.47      | THF       | 1484 <sup>a</sup>                            |
|                     | 20          | 12.0      | 3.4719    | 0.46      | THF       | 1484 <sup>a</sup>                            |

<sup>a</sup> Experiment with 10 mM DMPA

Table S3(c): Propagation rate coefficients for polymerization of DMAEMA in EtOH determined from PLP-SEC experiments conducted at 50 °C at varying laser pulse repetition rates (p.r.r.) tabulated as a function of weight fraction DMAEMA ( $w_{\text{DMAEMA}}$ ) in solution. Experiments were conducted with 5 mM DMPA unless otherwise noted.

| $w_{\text{DMAEMA}}$ | p.r.r. [Hz] | $x_p$ [%] | Log $M_1$ | $M_1/M_2$ | SEC setup | $k_p$ [L mol <sup>-1</sup> s <sup>-1</sup> ] |
|---------------------|-------------|-----------|-----------|-----------|-----------|----------------------------------------------|
| 0.625               | 10          | 0.7       | 4.7495    | 0.46      | THF       | 1050                                         |
|                     |             | 0.2       | 4.7258    | 0.50      | DMF       | 994                                          |
|                     | 15          | 0.7       | 4.5846    | 0.52      | THF       | 1078                                         |
|                     |             | 0.2       | 4.5942    | 0.54      | DMF       | 1102                                         |
|                     | 20          | 0.8       | 4.4803    | 0.54      | THF       | 1130                                         |
|                     |             | 0.2       | 4.4838    | 0.53      | DMF       | 1139                                         |
|                     | 25          | 0.6       | 4.3882    | 0.54      | THF       | 1143                                         |
|                     |             | 0.2       | 4.4017    | 0.53      | DMF       | 1179                                         |
| 0.50                | 10          | 0.7       | 4.6460    | 0.50      | THF       | 1054                                         |
|                     |             | 0.4       | 4.6290    | 0.52      | DMF       | 1014                                         |
|                     | 15          | 0.3       | 4.4942    | 0.53      | THF       | 1115                                         |
|                     |             | 0.4       | 4.4865    | 0.52      | DMF       | 1095                                         |
|                     | 20          | 0.4       | 4.3802    | 0.54      | THF       | 1143                                         |
|                     |             | 0.4       | 4.3908    | 0.53      | DMF       | 1172                                         |
| 0.375               | 10          | 0.2       | 4.5333    | 0.50      | THF       | 1105                                         |
|                     | 15          | 0.1       | 4.3909    | 0.54      | THF       | 1194                                         |
|                     | 15          | 0.1       | 4.3900    | 0.54      | THF       | 1150                                         |
| 0.30                | 10          | 1.2       | 4.4680    | 0.53      | THF       | 1199                                         |
|                     | 10          | 1.2       | 4.4679    | 0.53      | THF       | 1198                                         |
|                     | 10          | 1.2       | 4.4681    | 0.53      | THF       | 1200                                         |
| 0.25                | 10          | 1.2       | 4.4009    | 0.52      | THF       | 1238                                         |
|                     | 10          | 1.2       | 4.4008    | 0.52      | THF       | 1237                                         |
|                     | 10          | 1.2       | 4.4010    | 0.52      | THF       | 1239                                         |
| 0.20                | 35          | 2.2       | 3.7742    | 0.54      | THF       | 1294 <sup>a</sup>                            |
|                     | 40          | 2.3       | 3.7573    | 0.54      | THF       | 1422 <sup>a</sup>                            |
|                     | 40          | 2.3       | 3.7572    | 0.54      | THF       | 1358 <sup>a</sup>                            |
| 0.10                | 25          | 4.9       | 3.6585    | 0.47      | THF       | 1436 <sup>a</sup>                            |
|                     | 30          | 4.5       | 3.6176    | 0.47      | THF       | 1569 <sup>a</sup>                            |
|                     | 30          | 4.5       | 3.6175    | 0.47      | THF       | 1503 <sup>a</sup>                            |
| 0.05                | 20          | 4.0       | 3.5242    | 0.48      | THF       | 1696 <sup>a</sup>                            |
|                     | 20          | 4.0       | 3.5243    | 0.48      | THF       | 1695 <sup>a</sup>                            |
|                     | 20          | 4.0       | 3.5241    | 0.48      | THF       | 1697 <sup>a</sup>                            |

<sup>a</sup> Experiment with 10 mM DMPA

Table S3(d): Propagation rate coefficients for polymerization of DMAEMA in EtOH determined from PLP-SEC experiments conducted at 60 °C at varying laser pulse repetition rates (p.r.r.) tabulated as a function of weight fraction DMAEMA ( $w_{\text{DMAEMA}}$ ) in solution. Experiments were conducted with 5 mM DMPA unless otherwise noted.

| $w_{\text{DMAEMA}}$ | p.r.r. [Hz] | $x_p$ [%] | Log $M_1$ | $M_1/M_2$ | SEC setup | $k_p$ [L mol <sup>-1</sup> s <sup>-1</sup> ] |
|---------------------|-------------|-----------|-----------|-----------|-----------|----------------------------------------------|
| 0.625               | 20          | 0.9       | 4.5645    | 0.54      | THF       | 1387                                         |
|                     |             | 0.2       | 4.5660    | 0.51      | DMF       | 1392                                         |
|                     | 25          | 0.9       | 4.4803    | 0.54      | THF       | 1428                                         |
|                     |             | 0.2       | 4.4830    | 0.50      | DMF       | 1437                                         |
|                     | 30          | 1.0       | 4.4204    | 0.54      | THF       | 1493                                         |
|                     |             | 0.2       | 4.4208    | 0.51      | DMF       | 1494                                         |
| 0.5                 | 10          | 0.8       | 4.7339    | 0.46      | THF       | 1305                                         |
|                     |             | 0.4       | 4.7212    | 0.49      | DMF       | 1267                                         |
|                     | 15          | 0.8       | 4.5904    | 0.50      | THF       | 1407                                         |
|                     |             | 0.2       | 4.5924    | 0.53      | DMF       | 1413                                         |
|                     | 20          | 0.5       | 4.4942    | 0.54      | THF       | 1503                                         |
|                     |             | 0.2       | 4.4929    | 0.54      | DMF       | 1498                                         |
| 0.375               | 10          | 0.6       | 4.6195    | 0.47      | THF       | 1362                                         |
|                     | 20          | 0.6       | 4.3093    | 0.50      | THF       | 1334                                         |
|                     | 20          | 0.6       | 4.3089    | 0.50      | THF       | 1348                                         |
| 0.30                | 10          | 0.4       | 4.5418    | 0.51      | THF       | 1440                                         |
|                     | 10          | 0.4       | 4.5417    | 0.51      | THF       | 1439                                         |
|                     | 10          | 0.4       | 4.5419    | 0.51      | THF       | 1441                                         |
| 0.25                | 10          | 0.7       | 4.4693    | 0.51      | THF       | 1473                                         |
|                     | 10          | 0.7       | 4.4692    | 0.51      | THF       | 1472                                         |
|                     | 10          | 0.9       | 4.4694    | 0.51      | THF       | 1474                                         |
| 0.20                | 30          | 2.2       | 3.9100    | 0.49      | THF       | 1533 <sup>a</sup>                            |
|                     | 35          | 2.5       | 3.8444    | 0.51      | THF       | 1538 <sup>a</sup>                            |
|                     | 40          | 2.3       | 3.8226    | 0.52      | THF       | 1671 <sup>a</sup>                            |
| 0.10                | 25          | 1.2       | 3.7163    | 0.48      | THF       | 1659 <sup>a</sup>                            |
|                     | 30          | 1.1       | 3.6753    | 0.50      | THF       | 1812 <sup>a</sup>                            |
|                     | 30          | 1.1       | 3.6752    | 0.50      | THF       | 1736 <sup>a</sup>                            |
| 0.05                | 20          | 4.0       | 3.7782    | 0.50      | THF       | 1920 <sup>a</sup>                            |
|                     | 20          | 4.0       | 3.7780    | 0.50      | THF       | 1919 <sup>a</sup>                            |
|                     | 20          | 4.0       | 3.7783    | 0.50      | THF       | 1921 <sup>a</sup>                            |

<sup>a</sup> Experiment with 10 mM DMPA

Table S3(e): Propagation rate coefficients for polymerization of DMAEMA in EtOH determined from PLP-SEC experiments conducted at 70 °C at varying laser pulse repetition rates (p.r.r.) tabulated as a function of weight fraction DMAEMA ( $w_{\text{DMAEMA}}$ ) in solution. Experiments were conducted with 5 mM DMPA unless otherwise noted.

| $w_{\text{DMAEMA}}$ | p.r.r. [Hz] | $x_p$ [%] | Log $M_1$ | $M_1/M_2$ | SEC setup | $k_p$ [L mol <sup>-1</sup> s <sup>-1</sup> ] |
|---------------------|-------------|-----------|-----------|-----------|-----------|----------------------------------------------|
| 0.625               | 10          | 0.9       | 4.9340    | 0.47      | THF       | 1641                                         |
|                     | 15          | 0.8       | 4.7589    | 0.49      | THF       | 1645                                         |
|                     | 20          | 0.9       | 4.6371    | 0.51      | THF       | 1657                                         |
|                     | 25          | 1.0       | 4.5503    | 0.53      | THF       | 1696                                         |
|                     | 30          | 1.1       | 4.4803    | 0.53      | THF       | 1732                                         |
| 0.5                 | 15          | 0.6       | 4.6430    | 0.50      | THF       | 1605                                         |
|                     | 20          | 0.3       | 4.5305    | 0.51      | THF       | 1652                                         |
|                     | 25          | 0.6       | 4.4556    | 0.54      | THF       | 1738                                         |
| 0.375               | 10          | 0.6       | 4.6971    | 0.52      | THF       | 1647                                         |
|                     | 15          | 0.6       | 4.5446    | 0.52      | THF       | 1739                                         |
|                     | 20          | 0.9       | 4.4366    | 0.53      | THF       | 1808                                         |
|                     | 25          | 0.8       | 4.3433    | 0.54      | THF       | 1823                                         |
| 0.30                | 10          | 0.8       | 4.6107    | 0.50      | THF       | 1706                                         |
|                     | 10          | 0.8       | 4.6106    | 0.50      | THF       | 1705                                         |
|                     | 10          | 0.8       | 4.6108    | 0.50      | THF       | 1707                                         |
| 0.25                | 10          | 0.9       | 4.5446    | 0.52      | THF       | 1771                                         |
|                     | 15          | 0.8       | 4.3723    | 0.52      | THF       | 1787                                         |
|                     | 15          | 0.8       | 4.3720    | 0.52      | THF       | 1779                                         |
| 0.20                | 10          | 1.6       | 4.4529    | 0.53      | THF       | 1804 <sup>a</sup>                            |
|                     | 10          | 2.6       | 4.4502    | 0.50      | THF       | 1792 <sup>a</sup>                            |
|                     | 10          | 2.4       | 4.4528    | 0.53      | THF       | 1799 <sup>a</sup>                            |
| 0.10                | 25          | 1.9       | 3.7936    | 0.48      | THF       | 2005 <sup>a</sup>                            |
|                     | 25          | 1.9       | 3.7950    | 0.45      | DMF       | 2011 <sup>a</sup>                            |
|                     | 30          | 1.6       | 3.7428    | 0.51      | THF       | 2140 <sup>a</sup>                            |
|                     | 30          | 1.6       | 3.7427    | 0.51      | THF       | 2073 <sup>a</sup>                            |
|                     | 30          | 1.6       | 3.7490    | 0.45      | DMF       | 2171 <sup>a</sup>                            |
| 0.05                | 30          | 4.8       | 3.7284    | 0.53      | THF       | 2065 <sup>b</sup>                            |
|                     | 15          | 6.5       | 3.7380    | 0.46      | THF       | 2132 <sup>a</sup>                            |
|                     | 20          | 7.2       | 3.6369    | 0.46      | THF       | 2252 <sup>a</sup>                            |
|                     | 20          | 7.2       | 3.6370    | 0.46      | THF       | 2192 <sup>a</sup>                            |

<sup>a</sup> Experiment with 10 mM DMPA

<sup>b</sup> Experiment with 20 mM DMPA

Table S4: Propagation rate coefficients for polymerization of DMAEMA in BuOH determined from PLP-SEC experiments conducted with  $w_{\text{DMAEMA}} = 0.5$  and 5 mM DMPA at various temperatures and laser pulse repetition rates (p.r.r.).

| T [°C] | p.r.r. [Hz] | $x_p$ [%] | Log $M_1$ | $M_1/M_2$ | SEC setup | $k_p$ [L mol <sup>-1</sup> s <sup>-1</sup> ] |
|--------|-------------|-----------|-----------|-----------|-----------|----------------------------------------------|
| 30     | 10          | 0.8       | 4.4886    | 0.54      | THF       | 709                                          |
|        | 15          | 0.8       | 4.3171    | 0.52      | THF       | 716                                          |
|        | 15          | 0.8       | 4.3168    | 0.52      | THF       | 713                                          |
| 50     | 15          | 0.8       | 4.5164    | 0.54      | THF       | 1163                                         |
|        | 20          | 0.7       | 4.3856    | 0.54      | THF       | 1147                                         |
|        | 25          | 0.7       | 4.2886    | 0.52      | THF       | 1147                                         |
| 70     | 25          | 1.1       | 4.4914    | 0.54      | THF       | 1879                                         |
|        | 30          | 0.8       | 4.4177    | 0.54      | THF       | 1903                                         |
|        | 35          | 0.9       | 4.3538    | 0.54      | THF       | 1916                                         |
|        | 40          | 0.8       | 4.2398    | 0.46      | THF       | 1899                                         |
| 90     | 35          | 1.2       | 4.5164    | 0.53      | THF       | 2863                                         |
|        | 40          | 1.0       | 4.4666    | 0.54      | THF       | 2917                                         |
|        | 45          | 0.8       | 4.4096    | 0.53      | THF       | 2878                                         |
|        | 50          | 1.1       | 4.3723    | 0.54      | THF       | 2935                                         |

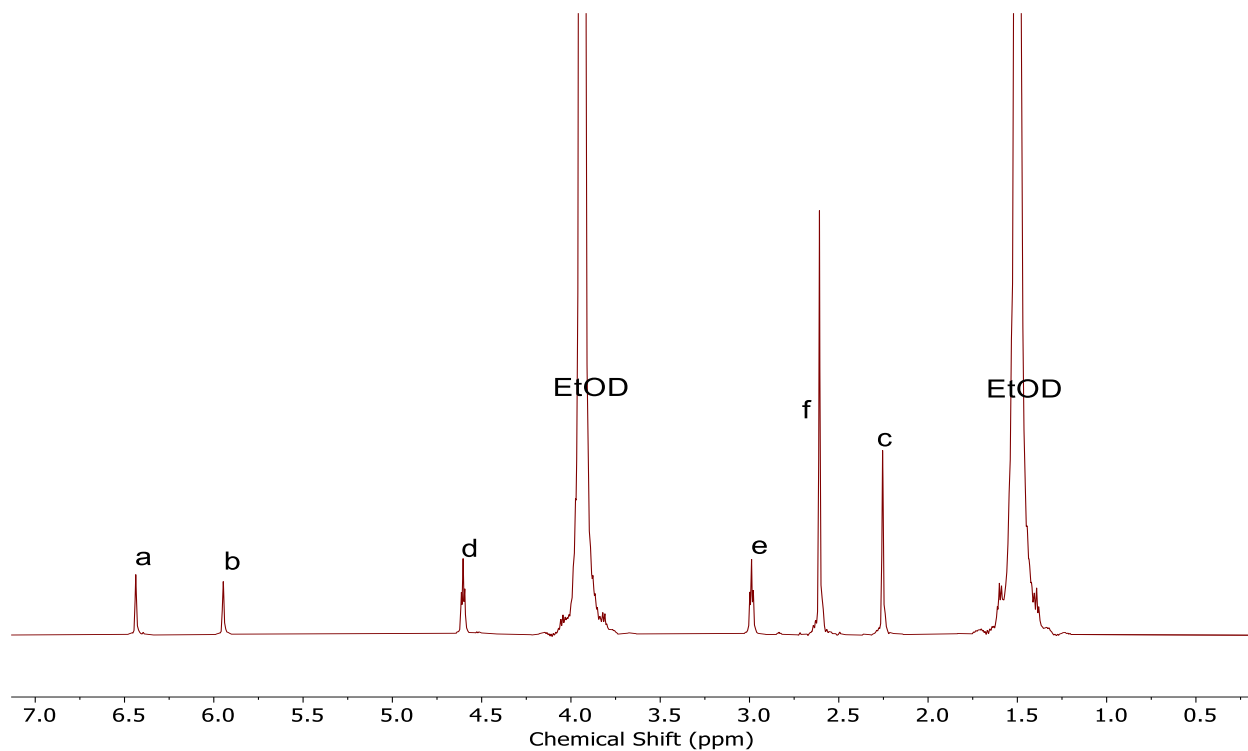

Figure S7: <sup>1</sup>H NMR (600 MHz) spectrum of PLP mixture with  $w_{\text{DMAEMA}} = 0.5$  in EtOD/D<sub>2</sub>O mixture at  $\alpha_{\text{EtOD}} = 0.75$  held for ~4 min at 60 °C. No ethyl methacrylate or 2-dimethylaminoethanol were observed in either spectrum, indicating that DMAEMA solvolysis does not occur within the timeframe of the PLP experiment.

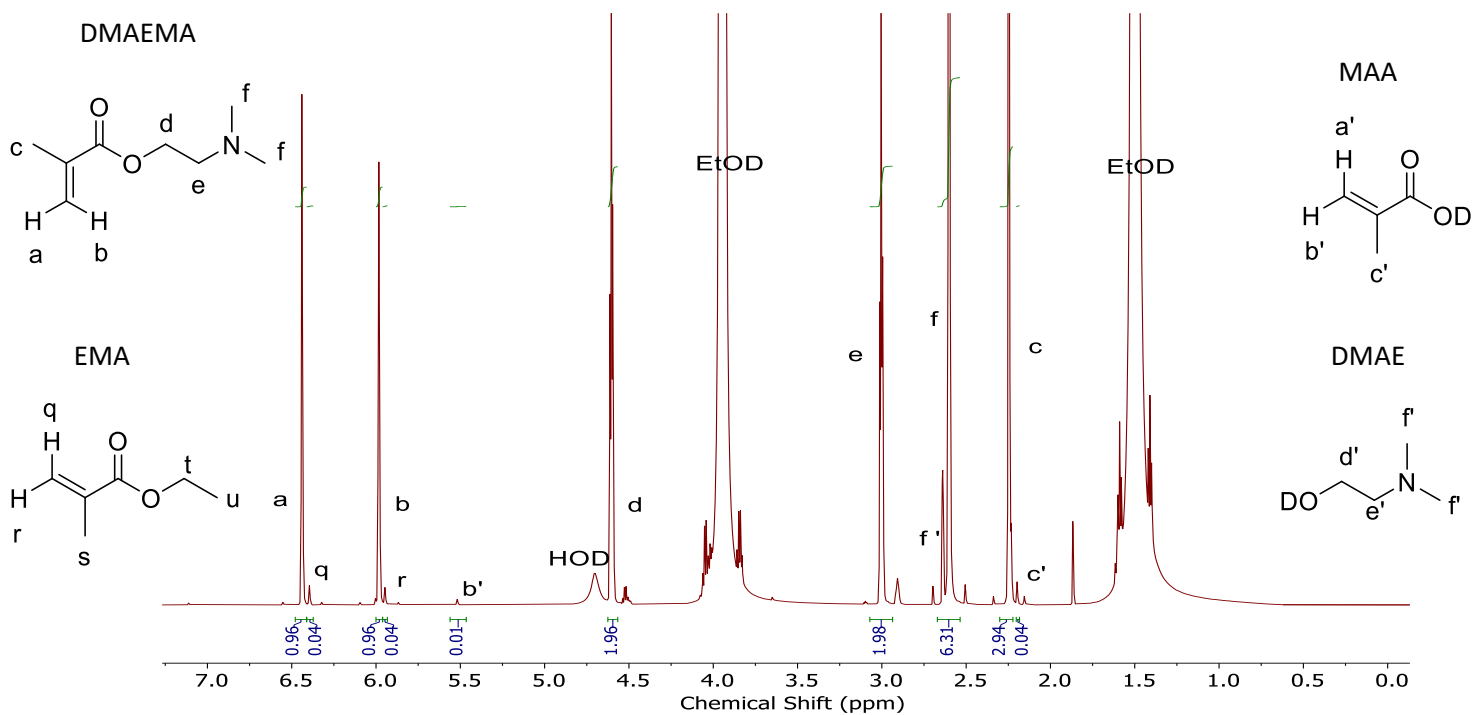

Figure S8:  $^1\text{H}$  NMR (700 MHz) spectrum of PLP mixture with  $w_{\text{DMAEMA}} = 0.5$  in EtOD/D<sub>2</sub>O mixture at  $\alpha_{\text{EtOD}} = 0.50$  held for ~4 min at 60 °C. Methacrylic acid, ethyl methacrylate and 2-dimethylaminoethanol were observed in both spectra, indicating that a small amount (< 5%) of DMAEMA solvolysis occurred within the timeframe of the PLP experiment.

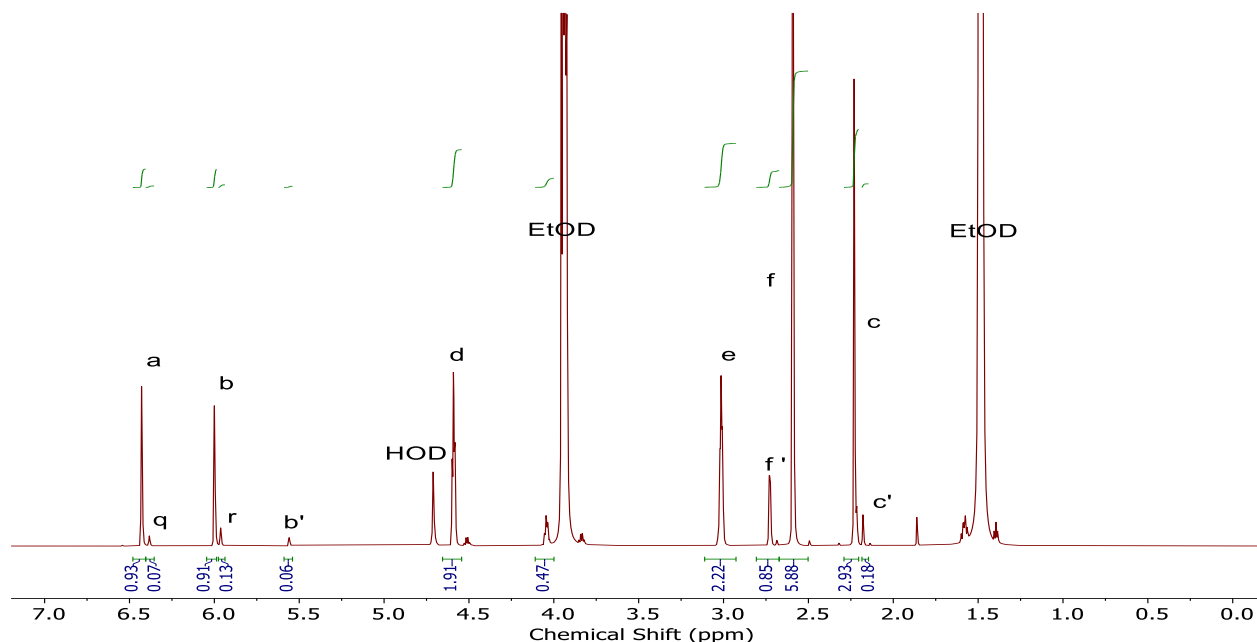

Figure S9:  $^1\text{H}$  NMR (700 MHz) spectrum of PLP mixture with  $w_{\text{DMAEMA}} = 0.5$  in EtOD/D<sub>2</sub>O mixture with  $\alpha_{\text{EtOD}} = 0.25$  held for ~4 min at 60 °C. Methacrylic acid, ethyl methacrylate and 2-dimethylaminoethanol were observed in both spectra, indicating that some DMAEMA solvolysis (<10%) occurred.

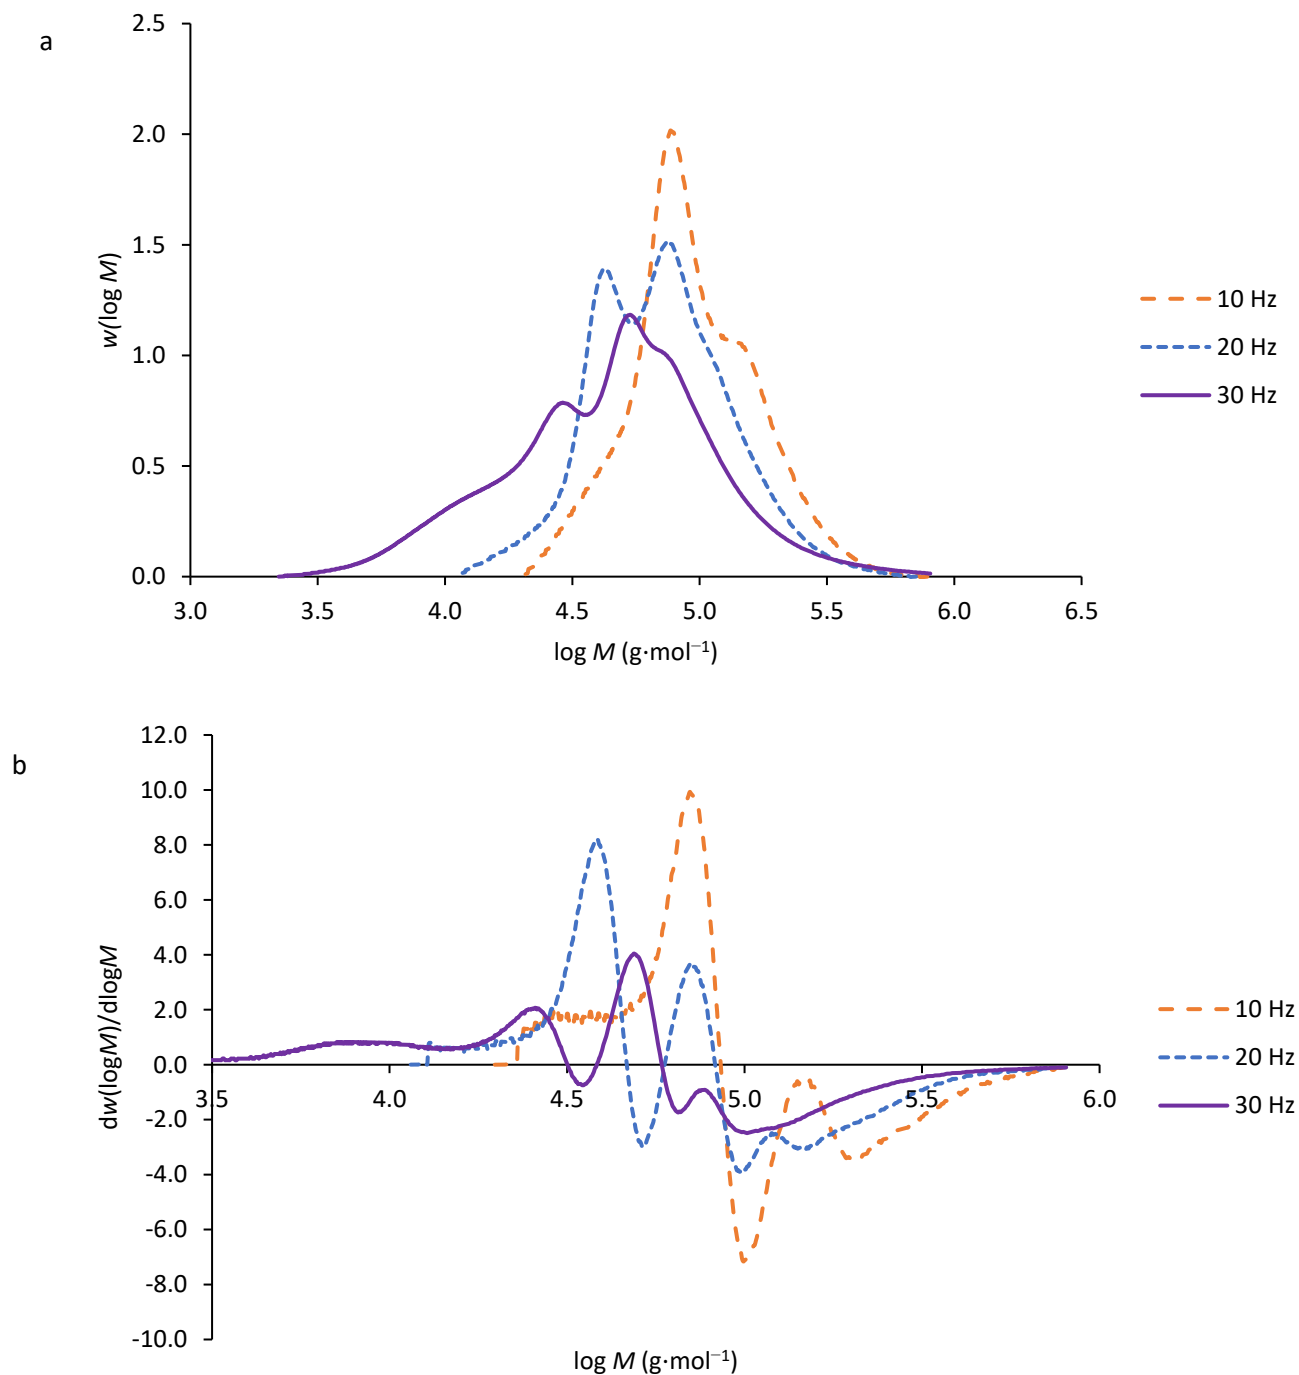

Figure S10: a) MMDs and b) first derivative curves from SEC analysis in THF for PDMAEMA generated by PLP with  $w_{\text{DMAEMA}} = 0.50$  in EtOH/H<sub>2</sub>O solution at  $\alpha_{\text{EtOH}} = 0.75$  at 60 °C and p.r.r. = 10, 20, and 30 Hz.



Table S5(a): Propagation rate coefficients for polymerization of DMAEMA in EtOH/H<sub>2</sub>O solutions determined from PLP-SEC experiments conducted at 25 °C at varying laser pulse repetition rates (p.r.r.) tabulated as a function of weight fraction DMAEMA ( $w_{\text{DMAEMA}}$ ) in solution. Experiments were conducted with 5 mM Darocur 1173.

| $w_{\text{DMAEMA}}$ | $\alpha_{\text{EtOH}}$ | p.r.r. [Hz] | $x_p$ [%] | $\log M_1$ | $M_1/M_2$ | SEC setup | $k_p$ [L mol <sup>-1</sup> s <sup>-1</sup> ] |
|---------------------|------------------------|-------------|-----------|------------|-----------|-----------|----------------------------------------------|
| 0.50                | 0.50                   | 10          | 0.3       | 4.6112     | 0.53      | Aqueous   | 903                                          |
|                     |                        | 10          | 0.3       | 4.6087     | 0.52      | Aqueous   | 898                                          |
|                     |                        | 10          | 0.3       | 4.6256     | 0.54      | Aqueous   | 934                                          |
| 0.50                | 0.25                   | 10          | 0.7       | 4.6955     | 0.50      | Aqueous   | 1033                                         |
|                     |                        | 10          | 0.7       | 4.7008     | 0.50      | Aqueous   | 1045                                         |
|                     |                        | 10          | 0.7       | 4.6963     | 0.50      | Aqueous   | 1034                                         |

Table S5(b): Propagation rate coefficients for polymerization of DMAEMA in EtOH/H<sub>2</sub>O solutions determined from PLP-SEC experiments conducted at 40 °C at varying laser pulse repetition rates (p.r.r.) tabulated as a function of weight fraction DMAEMA ( $w_{\text{DMAEMA}}$ ) in solution. Experiments were conducted with 5 mM Darocur 1173.

| $w_{\text{DMAEMA}}$ | $\alpha_{\text{EtOH}}$ | p.r.r. [Hz] | $x_p$ [%] | $\log M_1$ | $M_1/M_2$ | SEC setup | $k_p$ [L mol <sup>-1</sup> s <sup>-1</sup> ] |
|---------------------|------------------------|-------------|-----------|------------|-----------|-----------|----------------------------------------------|
| 0.50                | 0.75                   | 10          | 0.4       | 4.6460     | 0.51      | THF       | 1013                                         |
|                     |                        | 20          | 0.5       | 4.3829     | 0.52      | THF       | 1105                                         |
|                     |                        | 20          | 0.5       | 4.3828     | 0.52      | THF       | 1059                                         |
|                     | 0.50                   | 10          | 0.3       | 4.7778     | 0.50      | THF       | 1330                                         |
|                     |                        | 20          | 0.4       | 4.5109     | 0.54      | THF       | 1438                                         |
|                     |                        | 20          | 0.4       | 4.5108     | 0.54      | THF       | 1384                                         |
|                     | 0.25                   | 10          | 0.7       | 4.8588     | 0.49      | THF       | 1551                                         |
|                     |                        | 20          | 1.1       | 4.5933     | 0.53      | THF       | 1683                                         |
|                     |                        | 20          | 1.1       | 4.5932     | 0.53      | THF       | 1617                                         |

Table S5(c): Propagation rate coefficients for polymerization of DMAEMA in EtOH/H<sub>2</sub>O solutions determined from PLP-SEC experiments conducted at 60 °C at varying laser pulse repetition rates (p.r.r.) tabulated as a function of weight fraction DMAEMA ( $w_{\text{DMAEMA}}$ ) in solution. Experiments were conducted with 5 mM Darocur 1173.

| $w_{\text{DMAEMA}}$ | $\alpha_{\text{EtOH}}$ | p.r.r. [Hz] | $x_p$ [%] | $\log M_1$ | $M_1/M_2$ | SEC setup | $k_p$ [L mol <sup>-1</sup> s <sup>-1</sup> ] |
|---------------------|------------------------|-------------|-----------|------------|-----------|-----------|----------------------------------------------|
| 0.20                | 0.75                   | 10          | 5.7       | 4.4831     | 0.53      | THF       | 1826                                         |
|                     |                        | 10          | 5.6       | 4.4832     | 0.53      | THF       | 1825                                         |
|                     |                        | 10          | 5.5       | 4.4830     | 0.53      | THF       | 1827                                         |
| 0.50                | 0.75                   | 10          | 0.4       | 4.8456     | 0.48      | THF       | 1638                                         |
|                     |                        | 20          | 0.6       | 4.5817     | 0.54      | THF       | 1784                                         |
|                     |                        | 30          | 0.6       | 4.4096     | 0.53      | THF       | 1800                                         |
|                     | 0.50                   | 10          | 0.2       | 4.9193     | 0.50      | THF       | 1877                                         |
|                     |                        | 20          | 0.3       | 4.6549     | 0.54      | THF       | 2042                                         |
|                     |                        | 20          | 0.3       | 4.6548     | 0.54      | THF       | 1960                                         |
|                     | 0.25                   | 20          | 0.7       | 4.7589     | 0.52      | THF       | 2508                                         |
|                     |                        | 30          | 1.1       | 4.6136     | 0.54      | THF       | 2692                                         |
|                     |                        | 30          | 1.1       | 4.6137     | 0.54      | THF       | 2599                                         |

## References

- (1) K. B. Kockler, F. Fleischhaker and C. Barner-Kowollik, *Macromolecules*, 2016, **49**, 8572–8580.
- (2) R. A. Hutchinson, D. A. Paquet, J. H. McMinn, S. Beuermann, R. E. Fuller and C. Jackson, *5th International Workshop on Polymer Reaction Engineering (DECHEMA Monographs 131)*, 1995, 467.
- (3) R. A. Hutchinson, S. Beuermann, D. A. Paquet and J. H. McMinn, *Macromolecules*, 1997, **30**, 3490-3493.
- (4) M. Buback and C. H. Kurz, *Macromol. Chem. Phys.*, 1998, **199**, 2301–2310.
